# Supplementary material for: Effect of tungsten surface density of WO3–ZrO2 on its catalytic performance in hydrogenolysis of cellulose to ethylene glycol
Source: Royal Society of Chemistry journal article supplement (doi:10.1039/c6ra27524a), 2017-01-01
Supplement: c6ra27524a1.pdf [file c6ra27524a1.pdf]

**Electronic supplementary information (ESI) for the manuscript:**

**Effect of tungsten surface density of  $\text{WO}_x\text{-ZrO}_2$  on its catalytic performance  
in hydrogenolysis of cellulose to ethylene glycol**

Jiachun Chai<sup>a,b</sup>, Shanhui Zhu<sup>a,\*</sup>, Youliang Cen<sup>a,b</sup>, Jing Guo<sup>a,b</sup>, Jianguo Wang<sup>a</sup>, Weibin Fan<sup>a,\*</sup>

<sup>a</sup>State Key Laboratory of Coal Conversion, Institute of Coal Chemistry, Chinese Academy of Sciences, Taiyuan, Shanxi 030001, PR China

<sup>b</sup>University of Chinese Academy of Sciences, Beijing 100049, PR China

**Table of contents**

**Fig. S1 XRD pattern of microcrystalline cellulose.**

**Fig. S2 DR UV-Vis spectra of  $\text{WZr}_{30,850}$  and  $\text{WZr}_{30,900}$ .**

**Fig. S3  $\text{H}_2$ -TPR profiles of (a)  $\text{WZr}_{30,850}$  combined with Ru/C, (b)  $\text{WZr}_{30,850}$ ,  
and (c)  $\text{WZr}_{30,900}$ .**

**Fig. S4 XRD patterns of  $\text{WZr}_{x,800}$  with different tungsten loading.**

**Fig. S5 GC-MS analysis of the 2,2'-oxydiacetaldehyde.**

**Fig. S6  $^{13}\text{C}$  NMR spectrum of the products at the reaction of 0.5 h.**

**Table S1 BET surface area and tungsten surface density of  $\text{WZr}_{x,800}$ .**

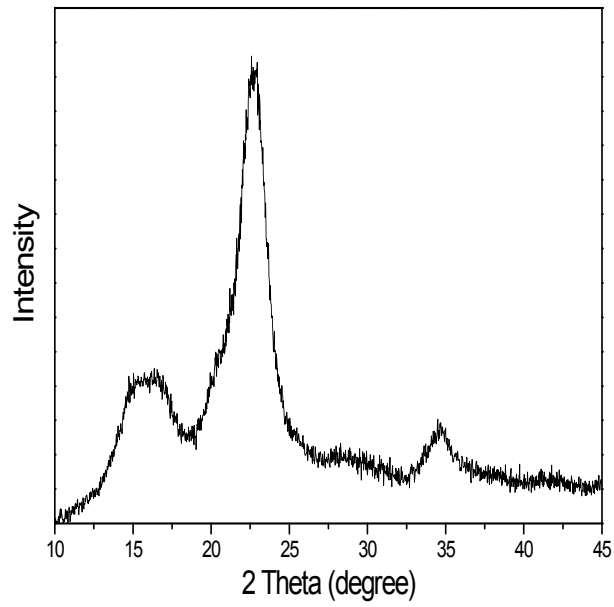

**Fig. S1** XRD pattern of microcrystalline cellulose.

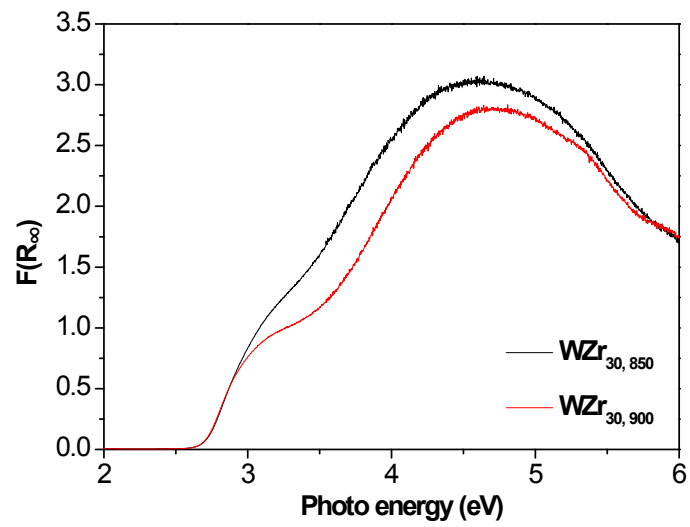

**Fig. S2** DR UV-Vis spectra of  $WZr_{30,850}$  and  $WZr_{30,900}$ .

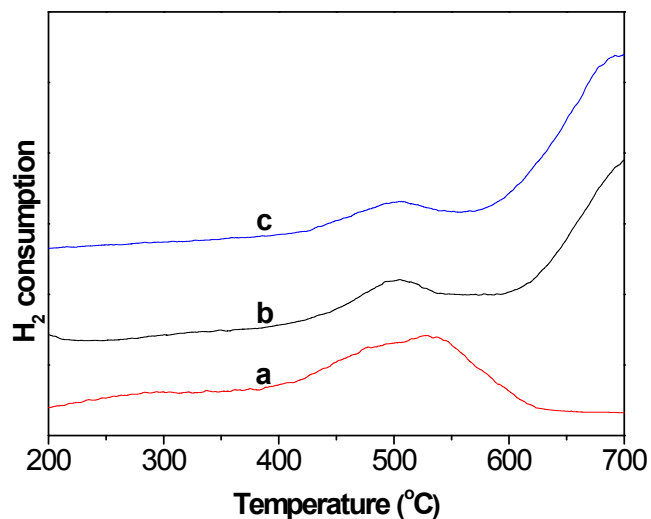

**Fig. S3** H<sub>2</sub>-TPR profile of (a) WZr<sub>30,850</sub> combined with Ru/C (b) WZr<sub>30,850</sub> (c) WZr<sub>30,900</sub>

The more intense reduction peak of the WZr<sub>30,850</sub> combined with Ru/C than those of WZr<sub>30,850</sub> and WZr<sub>30,900</sub> reveals that Ru/C promotes the reduction of WO<sub>3</sub> to W<sup>5+</sup> species.

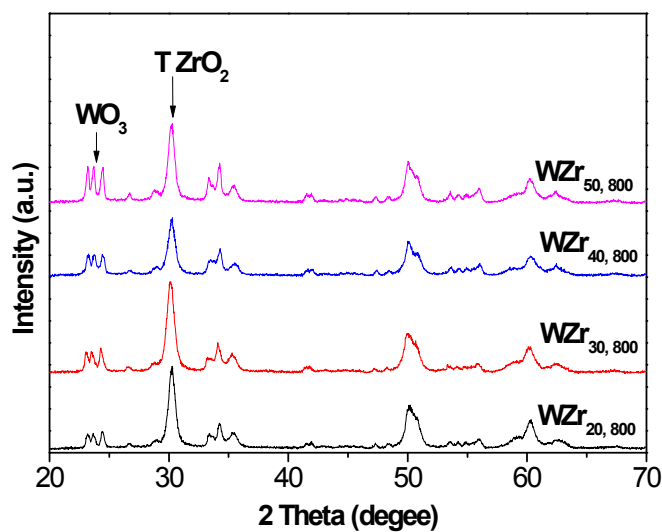

**Fig. S4** XRD patterns of WZr<sub>x,800</sub> with different tungsten loading.

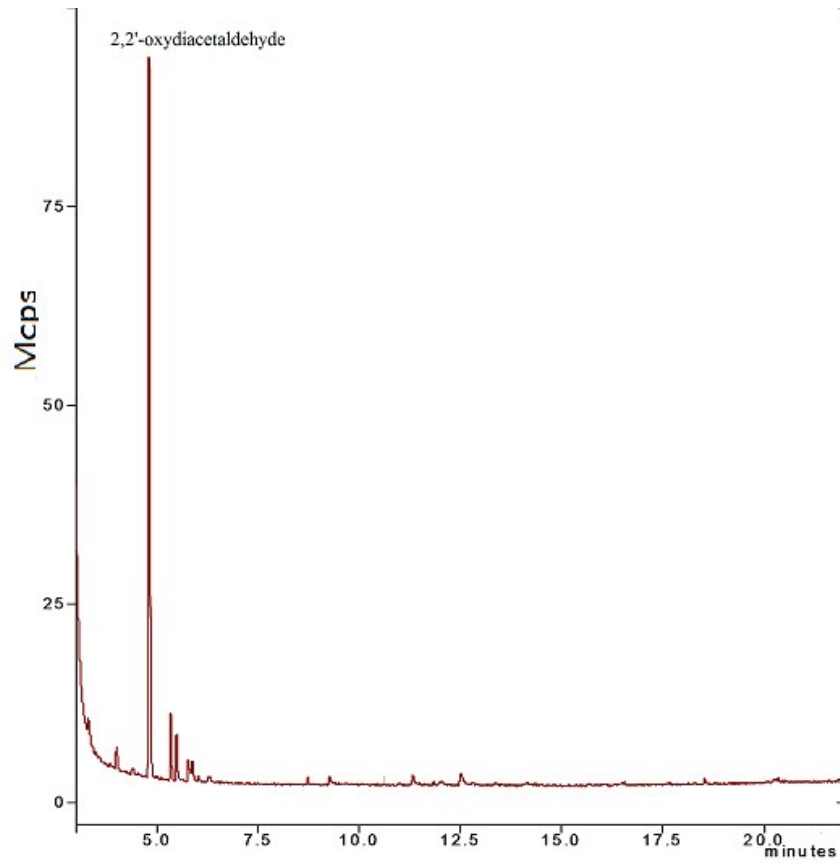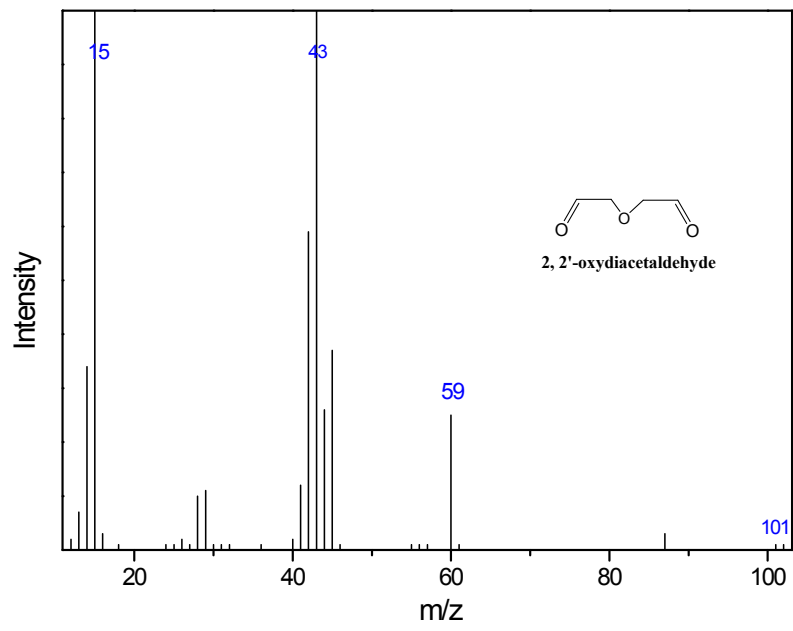

**Fig. S5** GC-MS analysis of the 2,2'-oxydiacetaldehyde

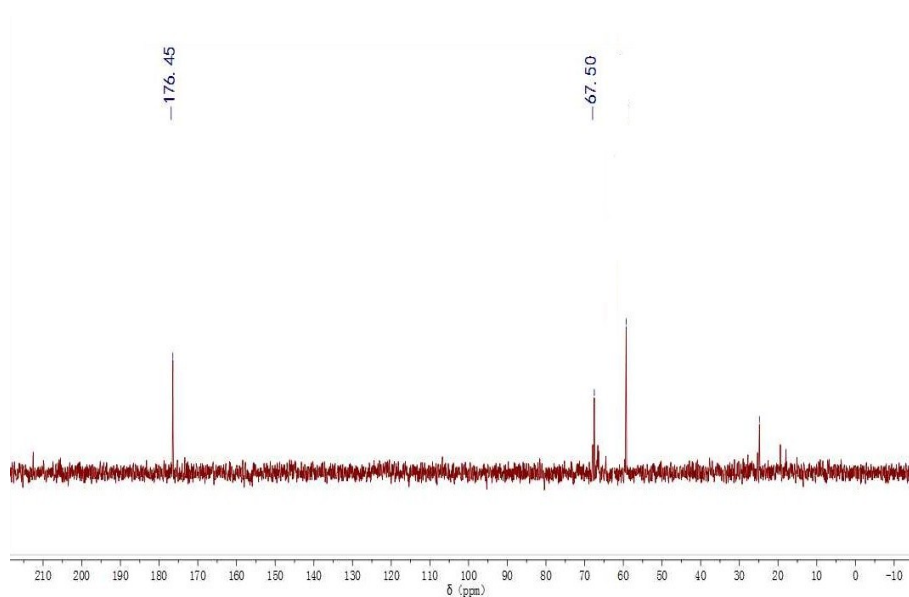

**Fig. S6** <sup>13</sup>C NMR spectrum of the products at the reaction of 0.5 h.

The 176.45 ppm peak can be attributed to the aldehyde carbon of 2,2'-oxydiacetaldehyde, and the 67.50 ppm peak can be attributed to the methylene carbon of 2,2'-oxydiacetaldehyde.

**Table S1** BET surface area and tungsten surface density of WZr<sub>x</sub>, 800.

| Samples                                       | WZr <sub>20</sub> , 800 | WZr <sub>30</sub> , 800 | WZr <sub>40</sub> , 800 | WZr <sub>50</sub> , 800 |
|-----------------------------------------------|-------------------------|-------------------------|-------------------------|-------------------------|
| BET (m <sup>2</sup> /g)                       | 49.2                    | 41.7                    | 36.3                    | 25.6                    |
| Tungsten surface density (W/nm <sup>2</sup> ) | 10.6                    | 18.9                    | 28.7                    | 51.8                    |
